1 **The HDL particle composition determines its anti-tumor activity in pancreatic cancer**

2

3 Raimund Bauer<sup>1\*</sup>, Kristina Kühner<sup>1</sup>, Florian Udonta<sup>2</sup>, Mark Wroblewski<sup>2</sup>, Isabel Ben-Batalla<sup>3</sup>,  
4 Ingrid Hassl<sup>1</sup>, Jakob Körbelin<sup>4</sup>, Clemens Röhr<sup>5</sup>, Matthias Unseld<sup>6</sup>, Matti Jauhiainen<sup>7</sup>, Markus  
5 Hengstschläger<sup>1</sup>, Sonja Loges<sup>8</sup>, Herbert Stangl<sup>1</sup>

6

7 <sup>1</sup>Center for Pathobiochemistry and Genetics, Medical University of Vienna, Vienna, Austria.

8 <sup>2</sup>Department of Hematology and Oncology with Sections BMT and Pneumology, University  
9 Comprehensive Cancer Center Hamburg, University Medical Center Hamburg-Eppendorf,  
10 Martinistraße 52, 20246 Hamburg, Germany

11 <sup>3</sup>Division of Personalized Medical Oncology (A420), German Cancer Research Center (DKFZ),  
12 Heidelberg, Germany

13 <sup>4</sup>ENDomics Lab, Department of Oncology, Hematology and Bone Marrow Transplantation,  
14 University Medical Center Hamburg-Eppendorf, Martinistr. 52, 20246 Hamburg, Germany

15 <sup>5</sup>Center of Excellence Food Technology and Nutrition, University of Applied Sciences Upper  
16 Austria, Wels, Austria

17 <sup>6</sup>Department of Medicine I, Division of Palliative Medicine, Medical University of Vienna,  
18 Vienna, Austria

19 <sup>7</sup>Minerva Foundation Institute for Medical Research and Finnish Institute for Health and  
20 Welfare, Genomics and Biobank Unit, Biomedicum 2U, Helsinki, Finland

21 <sup>8</sup>Department of Personalized Oncology, University Hospital Mannheim, Medical Faculty  
22 Mannheim, University of Heidelberg, Mannheim, Germany

23

24 **Running Title:** HDL particle composition determines its anti-tumor activity

25 **Keywords:** Pancreatic cancer, High-density lipoprotein, cholesterol efflux, ATP  
26 binding cassette subfamily A member 1, Scavenger receptor class B  
27 type 1

28 **Further information:** 5561 words, 7 Figures, 4 Supplementary Figures, 1 Supplementary  
29 Table.

30

31 **Editorial correspondence:** Raimund Bauer, PhD

32 Center for Pathobiochemistry and Genetics, Medical University  
33 of Vienna, Vienna, Austria.

34 email: [raimund.bauer@meduniwien.ac.at](mailto:raimund.bauer@meduniwien.ac.at)

35 tel.: 0043 40160 38022

36

37 **Authors report no potential conflicts of interest.**

38 **Abstract**

39 Despite significant efforts in the last years to improve therapeutic options, pancreatic cancer  
40 remains a fatal disease and is expected to become the second leading cause of cancer-related  
41 deaths in the next decade. Late diagnosis and a complex, fibrotic tumor microenvironment  
42 produces a therapeutically hardly approachable situation with rapidly emerging resistance  
43 mechanisms. In response to this hostile microenvironment, previous research identified lipid  
44 metabolic pathways to be highly enriched in pancreatic ductal adenocarcinoma (PDAC) cells.  
45 Thereby, cholesterol uptake and synthesis was shown to promote a growth advantage to, and  
46 chemotherapy resistance for PDAC tumor cells. Here, we demonstrate that efficient, net-  
47 cholesterol removal from cancer cells, driven by high-density lipoprotein (HDL) mediated efflux,  
48 results in a significant PDAC cell growth reduction, apoptosis and a decreased PDAC tumor  
49 development *in vivo*. This effect is driven by an HDL particle composition-dependent  
50 interaction with SR-B1 and ABCA1 on cancer cells, two major lipid flux receptors, which  
51 differentially regulate cholesterol transport at the plasma membrane. Eventually, we show that  
52 pancreatic cancer patients display reduced plasma levels of HDL-cholesterol, directly  
53 translating into a reduced cholesterol efflux capacity of patient-derived plasma samples. We  
54 conclude that cholesterol depletion from PDAC cells, together with possible interventions that  
55 shunt the import and endogenous synthesis pathways of cholesterol, might represent a  
56 promising strategy to increase and complement the currently available treatment options to  
57 improve the prognosis of patients suffering from PDAC.

58

## 59 Introduction

60 In contrast to the well-studied role of high-density lipoproteins (HDL) in cardiovascular  
61 research, its functional impact on cancer biology is less clear defined. Clinical investigations  
62 elaborated on the association of plasma apolipoprotein A1 (APOA1) / HDL levels and the risk  
63 of developing cancer, whereby the large majority of the studies reported an inverse  
64 association. For example, in randomized controlled trials of lipid-altering interventions, a  
65 significant inverse correlation between HDL cholesterol (HDL-C) and cancer incidence was  
66 found (1). Moreover, within the European Prospective Investigation into Cancer and Nutrition,  
67 the concentrations of HDL and APOA1 were inversely associated with the risk of colon cancer  
68 (2). In agreement with clinical data, preclinical studies that explored the mechanistic role of  
69 HDL in carcinogenesis predominantly attributed tumor protective functions for these lipoprotein  
70 particles. For example, B16F10 melanoma-bearing mice expressing a human APOA1  
71 transgene exhibited reduced tumor burden, decreased tumor-associated angiogenesis, lower  
72 metastatic potential and enhanced survival. These effects were reproduced by the injection of  
73 plasma-purified human APOA1 protein into *ApoA1* knockout (KO) mice (3). To examine a  
74 causal role of reduced APOA1 / HDL levels in patients suffering from ovarian cancer, mouse  
75 *in vivo* studies with ID8 ovarian adenocarcinoma cells revealed a significant anti-tumor  
76 capacity of the human *Apoa1* transgene as well as the therapeutic administration of APOA1  
77 mimetic peptides (4). Here, APOA1 and APOA1 mimetic peptides directly reduced the viability  
78 and proliferation of ID8 tumor cells and *cis*-platinum-resistant human ovarian cancer cell lines  
79 by the binding and removal of the mitogenic lipid lysophosphatidic acid (4).

80 Interestingly, a work by Cedo et al. challenged the anti-tumor activity of mature, APOA1  
81 containing HDL. By using a model of inherited breast cancer, transgenic overexpression of  
82 human APOA1 did not result in inhibition of tumor growth. In contrast, the APOA1 mimetic  
83 peptide D-4F significantly increased tumor latency and reduced tumor outgrowth (5). Of note,  
84 APOA1 mimetic peptides as well as discoidal reconstituted HDL, which mimic pre- $\beta$  HDL  
85 particles in the circulation, are highly efficient acceptors of ATP binding cassette subfamily A  
86 member 1 (ABCA1) - mediated cholesterol efflux (6-8). In contrast, spherical, lipid rich mature  
87 HDL particles serve as high affinity ligands and donors for bidirectional, SR-B1 mediated  
88 cholesterol transport at the plasma membrane (9).

89 Pancreatic cancer is one of the deadliest and least therapeutically approachable malignancies  
90 with a median 5-year survival rate of approximately 5-10% (10,11). The prime reasons for this  
91 dismal prognosis are difficulties in early diagnosis and a highly diverse and hostile tumor  
92 microenvironment (TME) that promotes therapy unresponsiveness and fast developing  
93 resistance mechanisms (10,12). The TME is composed of immune cells, cancer associated  
94 fibroblasts and a dense meshwork of extracellular matrix proteins, which cause desmoplasia  
95 and a high interstitial fluid pressure (10,12). This hostile TME forces tumor cells to

96 metabolically adapt to meet their specific requirements for proliferation, migration and invasion.  
97 Transcriptomic analyses revealed that lipid metabolic pathways are enriched in pancreatic  
98 ductal adenocarcinoma (PDAC) compared with normal pancreas. In particular, cholesterol  
99 uptake processes such as low-density lipoprotein receptor (LDLR) expression are highly  
100 activated in the malignant tissue (13). The inhibition of cholesterol uptake by PDAC cells in  
101 turn was shown to reduce cancer cell proliferation and sensitizes these cells towards  
102 chemotherapeutic interventions thereby identifying this metabolic axis as an interesting novel  
103 target for therapeutic interventions (13). Interestingly, APOA1, the main structural component  
104 of HDL and well known for its capacity to remove excess cholesterol from peripheral cells, has  
105 been identified as a potential biomarker in the detection of PDAC by comparative serum protein  
106 expression profiling (14). Although a causative link between cholesterol depletion and a  
107 reduction in pancreatic cancer malignancy seems likely, whether and how HDL particles exert  
108 an anti-tumorigenic effect in PDAC remains largely unknown.

109 By combining *in vitro* analyses that elucidate the impact of HDL particles on tumor cells with  
110 *in vivo* experiments using *Apoa1* knockout mice, we show that the HDL particle composition  
111 likely determines its anti-tumor activity. Reconstituted, small discoidal HDL particles displayed  
112 an increased ability to block tumor cell growth compared to lipid rich, cholesterol-laden  
113 spherical HDLs. This anti-tumorigenic capacity of small rHDL particles correlated with a lower  
114 affinity to scavenger receptor class B type 1 (SR-B1) - mediated lipid influx and a higher affinity  
115 to ABCA1-mediated cholesterol efflux. This study provides evidence for a particle composition-  
116 based anti-tumor activity of HDL in PDAC, which is at least in part regulated by an efficient  
117 cholesterol acceptor function of small, lipid poor HDLs. Therefore, we speculate that HDL-  
118 mediated cholesterol removal in combination with the blockade of cholesterol uptake from  
119 cancer cells might represent a novel, powerful mechanism to increase the efficacy of the  
120 current available concepts in PDAC treatment.

121  
122

123 **Materials and Methods**

124 **Animals.** C57Bl6/J *Apoa1* knockout (*Apoa1* KO) mice were from The Jackson Laboratory  
125 (B6.129P2-*Apoa1*<sup>tm1Unc</sup>/J). *Apoa1* KO mice were bred heterozygously and the wildtype  
126 littermates were used as controls. All animal experiments were carried out in concordance with  
127 the institutional guidelines for the welfare of animals and were approved by the local licensing  
128 authority Hamburg (project number G36/13 and G126/15). Housing, breeding and experiments  
129 were performed with animals between 10 and 16 weeks of age under a 12h light – 12 h dark  
130 cycle and standard laboratory conditions (22 ± 1 °C, 55% humidity, food and water ad libitum).

131  
132 **Cell lines and culture conditions.** The murine pancreatic adenocarcinoma cells lines Panc02  
133 and 6066 were a kind gift of Dr. Lars Ivo Partecke (Schleswig) and were maintained in RPMI  
134 medium supplemented with 10% fetal calf serum (FCS), 2 mM L-glutamine, 100 U/ml penicillin  
135 and 100 µg/ml streptomycin (complete RPMI). The human pancreatic adenocarcinoma cell  
136 line BxPC3 was from ATCC and maintained in complete RPMI medium. The murine melanoma  
137 cell line B16F10, lewis lung carcinoma cells (LLC) and the breast adenocarcinoma cell line  
138 E0771 were a kind gift of Prof. Dr. Peter Carmeliet and Prof. Massimiliano Mazzone (VIB  
139 Vesalius Research Center, KU Leuven) and maintained in DMEM medium supplemented with  
140 10% FCS, 2 mM L-glutamine, 100 U/ml penicillin and 100 µg/ml streptomycin (complete  
141 DMEM). Cells were maintained at 37°C and 5 % CO<sub>2</sub> in a humidified atmosphere and routinely  
142 tested to be mycoplasma negative (MycoAlert Mycoplasma Detection Kit, Lonza). Cells were  
143 cultured no longer than 15 passages before experimental use.

144  
145 **Cholesterol depletion assays.** Panc02, 6066 and BxPC3 cells (1x10<sup>4</sup> cells per well of a 96  
146 well plate) were seeded in RPMI medium containing either 2%FCS, 2% lipoprotein deficient  
147 FCS (LPDS) or 2% LPDS containing 5µM lovastatin and 100µM mevalonate for cholesterol  
148 depletion (15,16). Cells were grown for 96 h and cellular viability was determined at indicated  
149 time points using the cell proliferation reagent WST1 (Roche) according to the manufacturer's  
150 instructions.

151  
152 **Preparation of reconstituted HDL (rHDL) particles.** Native human HDL was isolated from  
153 healthy donors using serial density ultracentrifugation as described (17,18). Reconstituted  
154 HDL particles were prepared according to the method of Jonas et al. (19,20). Briefly, 1mg of  
155 native HDL was delipidated twice using 5mL ethanol:diethyl ether (3:2). The supernatant was  
156 discarded and the remaining solvents were evaporated with nitrogen gas. Phosphatidylcholine  
157 (PC), cholesterol (C) and cholesteryl-palmitate (CE, in chloroform:methanol (2:1)) were  
158 combined in specific molar ratios and the solvents were evaporated with nitrogen gas. The  
159 dried lipids were resuspended in 200 µL buffer A (150mM NaCl, 0.01% EDTA, 10mM Tris/HCl,

160 pH 8.0) and 50  $\mu$ L of a 30 mg/mL sodium deoxycholate solution was added to disperse the  
161 lipids. The mixture was stirred at 4°C for two hours. Delipidated HDL was dissolved in 250  $\mu$ L  
162 of buffer A. Both suspensions were mixed in a glass vial and stirred at 4°C overnight. The  
163 suspension was then filtered twice through a 4 mL 3K Amicon filter tube and the protein  
164 concentration was determined. Reconstituted HDL was overlaid with nitrogen gas, and stored  
165 at 4°C. To prepare tracer-labeled rHDL, 25  $\mu$ Ci  $^3$ H Cholesteryl oleate (Perkin Elmer,  
166 NET746L001MC) and 12.5  $\mu$ Ci  $^{14}$ C Cholesterol (Amersham, CFA128) dissolved in toluene  
167 were added to the lipid mixture (for an equivalent of delipidated APOA1 of 500 $\mu$ g) before  
168 evaporation.

169  
170 **(r)HDL treatments of pancreatic adenocarcinoma cell lines.** Panc02 and 6066 cells were  
171 starved in a T75 flask overnight in RPMI medium containing 0.1% FCS. Next,  $1 \times 10^4$  cells were  
172 seeded per well of a 96 well plate in RPMI medium containing 2% FCS with the addition of  
173 indicated HDL particles (75  $\mu$ g/ml). To inhibit SR-B1, BLT1 (0.5 $\mu$ M) was added 30 min before  
174 the addition of HDL to the cell suspension. For ABCA1 activation, TO901317 (or DMSO  
175 control) was added at the indicated concentrations directly to the starvation medium the day  
176 before the assay and throughout the experiment.

177  
178 **Quantitative PCR:** Total RNA was isolated from cells or murine liver tissue using the Relia  
179 Prep RNA Tissue Miniprep System (Promega) according to the manufacturer's instructions.  
180 One  $\mu$ g of RNA was reverse transcribed into single stranded cDNA (Go Script Reverse  
181 Transcription System, Promega) and subsequently used for qPCR analyses on a Step One  
182 Plus real time PCR detection system (Applied Biosystems). Expression levels of genes of  
183 interest were normalized to hypoxanthine guanine phosphoribosyl transferase (*Hprt*) and the  
184 relative fold gene expression compared to control was calculated using the  $2^{-(\Delta\Delta Ct)}$  method.

185  
186 **Western blotting.** 0.5  $\mu$ l of mouse plasma or 20  $\mu$ g of Panc02 RIPA total protein extracts were  
187 analyzed by reducing, SDS-PAGE (8% PAA gel) and transferred to nitrocellulose membranes.  
188 Nonspecific binding sites were blocked with TBS (20 mM Tris-HCl, pH 7.4, 137 mM NaCl)  
189 containing 5% (w/v) fatty acid-free BSA and 0.1% Tween-20 (blocking buffer) for 1 h at room  
190 temperature. Proteins of interest were detected with antibodies for APOA1 (in-house produced  
191 rabbit polyclonal anti-human APOA1 antibody), ABCA1 (MAB10005, Merck) and  $\beta$ -ACTIN  
192 (clone AC-74, Sigma Aldrich) followed by incubation with HRP-conjugated secondary  
193 antibodies and development with the enhanced chemiluminescence protocol (Pierce).

194  
195 **Cholesterol flux assays.** To measure cholesterol efflux from Panc02 or 6066 cells to HDL  
196 particles,  $0.1 \times 10^6$  cells were seeded in 900  $\mu$ l of complete RPMI per well of a 12 well plate and

197 incubated for 24 h at 37°C and 5 % CO<sub>2</sub>. Next, cells were trace-labeled for another 24 h with  
198 <sup>3</sup>H cholesterol (Perkin Elmer, NET139) by adding 100 µl of complete RPMI containing 5µCi <sup>3</sup>H  
199 cholesterol / ml per well. The next day, cells were washed twice with warm RPMI medium  
200 containing 0.1% FCS and once with 1 ml of warm PBS. After carefully removing the medium,  
201 500 µl of 0.1% FCS-containing RPMI containing HDL particles (10 µg/ml) to the cells. When  
202 analyzing the cholesterol acceptor capacity of human plasma samples, instead of HDL  
203 particles, 10 µl (2%) of plasma was added to 500 µl of 0.1% FCS-containing RPMI. In SR-B1  
204 inhibition studies, BLT1 (1µM) was added 1 h prior to the addition of efflux acceptors. For the  
205 activation of ABCA1 expression, the LXR agonist TO901317 (5µM) was added to cells 48 h  
206 prior to the addition of efflux acceptors. Efflux acceptors were incubated for 8 h with the cells.  
207 To analyze the transfer of cholesterol and its esters from HDL to the cellular compartment,  
208 tracer-labeled HDL particles (10 µg/ml) were again diluted in 0.1% FCS containing RPMI  
209 medium and incubated for 8 h with the cells. Supernatants are collected and cleared from  
210 cellular debris by centrifugation at 10.000 x g for 10 min at room temperature. Cells were  
211 washed twice with PBS and lysed by the addition of 500 µl 0.1N NaOH. 200 µl of either  
212 supernatant or cell lysate were mixed with 8 ml of Ultima Gold scintillation cocktail and  
213 analyzed by scintillation counting.

214

215 **Adeno-associated viral (AAV) particle production.** The production of liver-targeting AAV  
216 particles of the serotype AAV2.8 was performed as previously described in detail (21-23).  
217 Briefly, the full length murine APOA1 cDNA was inserted into a pAAV-MCS plasmid containing  
218 AAV inverted terminal repeats (ITR) using BstBI (fwd) and BsrGI (rev) restriction enzyme sites.  
219 Together with a pAAV rep2 cap8 transfer plasmid and an AdpXX6 helper plasmid, HEK cells  
220 were co-transfected and virus particles purified from cell pellets and supernatants using  
221 iodixanol density gradients (21,23).

222

223 **In vivo experiments.** To compare tumor growth kinetics in WT and *Apoa1* KO mice, 0.5 x 10<sup>6</sup>  
224 Panc02, B16F10 or LLC cells were implanted subcutaneously into the right flank of mice.  
225 E0771 cells were implanted orthotopically into the second mammary fat pad. Tumor size was  
226 measured with a digital caliper and the volume was calculated using the formula V= (length<sup>2</sup> x  
227 width) / 2. For histological analyses, pimonidazole (1 mg, i.p.) was injected 2 h before sacrifice.  
228 For AAV-mediated reconstitution of hepatic APOA1 levels in *Apoa1* KO mice, 2x10<sup>11</sup> AAV2.8  
229 particles encoding the full length murine APOA1 mRNA (AAV-APOA1) were administered  
230 intravenously 5 days prior to tumor cell inoculation. For rHDL injection studies, tumors were  
231 grown to a size of 100 mm<sup>3</sup>. Afterwards, mice received intravenous injections of either 0.2 mg  
232 rHDL (PC:C:CE:APOA1 = 100:12.5:0:1; ZLB Behring, a kind gift of Prof. Matti Jauhiainen) or  
233 an equivalent volume of sterile PBS every 72 h.

234

235 **Collection of plasma samples and analysis of lipid parameters.** Murine blood samples  
236 were obtained by retroorbital bleeding and collection of blood into precoated EDTA tubes  
237 (Sarstedt). Human blood samples were collected into precoated EDTA tubes from pancreatic  
238 cancer patients under informed consent and strict adherence to institutional guidelines of the  
239 Medical University of Vienna (Ethik Votum 1035/2020). Blood samples were immediately  
240 centrifuged for 15 min at 3000 x g at room temperature and plasma samples were collected  
241 and frozen at -80°C until further use. Total plasma triglycerides, cholesterol and HDL-C were  
242 measured with the Triglyceride FS, Cholesterol FS and HDL-C Immuno FS kit systems  
243 (DiaSys).

244

245 **Analysis of intratumoral hypoxia.** Tumor samples were fixed overnight in 4%  
246 paraformaldehyde at 4 °C and embedded in paraffin. Paraffin sections (4 µm) were stained  
247 with antibodies to detect tumor hypoxia (pimonidazole, HP3-1000kit) as previously described  
248 (24). For morphometric analysis, 8-10 optical fields per tumor section were acquired using a  
249 Zeiss Axio Scope A1 and images were analyzed using the NIH Image J software.

250

251 **Flow cytometry.** Flow cytometric analysis of enzymatically digested tumor tissue was  
252 essentially performed as described in (24). MRC1<sup>+</sup> macrophages were gated as PE-Cy7  
253 CD11b<sup>+</sup> (clone M1/70 BD Bioscience), PE F4/80<sup>+</sup> (clone BM8, Biolegend) and FITC CD206  
254 (MRC1)<sup>+</sup> (clone C068C2, Biolegend). Granulocytic myeloid derived suppressor cells (GMDSC)  
255 were gated as PE-Cy7 CD11b<sup>+</sup>, PE Ly6-G<sup>+</sup> (clone 1A8 BD Bioscience) and PerCP-Cy5.5 Ly6-  
256 C<sup>int</sup> (clone Hk1.4, eBioscience). T cells were characterized as APC CD3<sup>+</sup> (clone 17A2,  
257 eBioscience) and either eFluor 450 CD8a<sup>-</sup> (clone 53-6.7, eBioscience) FITC CD4<sup>+</sup> (clone  
258 GK1.5, Biolegend) for T helper cells or vice versa for cytotoxic T cells. DAPI was used as a  
259 viability stain.

260

261 **Detection of cellular apoptosis.** Trypsinized and washed Panc02 cells were stained with the  
262 FITC Annexin V Apoptosis Detection Kit with 7-AAD (Biolegend) and analyzed using the  
263 CytoflexS Flow Cytometer (Beckman Coulter).

264

265 **Statistics.** Data represent mean ± SEM of representative experiments. To compare the means  
266 of two groups, an unpaired, two-tailed student's t-test was used. Multiple comparison testing  
267 in experiments with more than two groups was performed using one-way ANOVA unless  
268 otherwise stated. Statistical significance was assumed when p<0.05.

269



270 **Results**

271 **Cholesterol depletion and small, discoidal HDL particles efficiently inhibit the growth of**  
272 **PDAC cell lines.** Previous studies indicate that cancer cells show increased sensitivity  
273 towards cholesterol depletion due to their high need of cholesterol for cellular growth (25). In  
274 pancreatic cancer, the blockade of cholesterol uptake and the depletion of cholesterol  
275 availability via statins have been shown to reduce pancreatic cancer risk in preclinical as well  
276 as clinical settings (13,26). In accordance, reducing cholesterol availability by culture of cells  
277 in lipoprotein deficient serum (2% LPDS) decreased the viability of murine pancreatic  
278 adenocarcinoma cells Panc02 (Figure 1A). Cholesterol depletion in Panc02 cells by lovastatin  
279 further reduced cellular viability (Figure 1A). By comparing murine pancreatic cancer cell lines  
280 Panc02, 6066 (27,28) and the human pancreatic cancer cell line BxPC3 regarding their  
281 sensitivity towards cholesterol depletion, all three cell lines demonstrated reduced cellular  
282 viability, with Panc02 cells being the most sensitive (Figure 1B). HDL particles serve as  
283 important acceptors of cellular cholesterol, with the capacity to remove excess cholesterol from  
284 peripheral cells (29). Importantly, and within the HDL pool, cholesterol efflux capacity differs  
285 according to the HDL particle size, lipid and protein composition and the specific affinities for  
286 cellular efflux receptors such as ABCA1, ABCG1 or SR-B1 (9,30,31). By comparing the impact  
287 of native human spherical HDL (predominantly cholesterol donors) with small, lipid-poor  
288 reconstituted HDLs (rHDL, predominantly cholesterol acceptors) on the proliferative capacity  
289 of Panc02 cancer cells, we observed that under serum starvation conditions, rHDLs reduced  
290 cellular viability more efficiently (Figure 1C). Although HDLs decreased Panc02 viability also  
291 with increasing concentrations of serum in the cell culture medium, the particle-specific effect  
292 was attenuated (Figure 1C).

293  
294 **The HDL particle composition affects viability and apoptosis of PDAC cells.** To evaluate  
295 a potential particle-specific anti-tumor effect of HDL, we produced rHDL particles with varying  
296 lipid compositions to either mimic small, discoidal HDL particles (rHDL1) or spherical, lipid-rich  
297 HDLs (rHDL2; Figure 2A). Treatment of Panc02 and 6066 murine PDAC cell lines revealed  
298 that small HDL discs (rHDL1) induced a profound reduction in cellular viability, whereas  
299 treatment with nHDL and rHDL2 resulted in only a mild attenuation in pancreatic cancer cell  
300 viability (Figure 2B and C). As persistent cholesterol starvation can induce cellular apoptosis  
301 (32,33), we analyzed apoptosis rates in HDL-treated pancreatic cancer cells (representative  
302 FACS blots are shown in Figure 2D). Whereas all HDL particles promoted a slight decrease in  
303 the frequency of living cells, only rHDL1 treatment led to a significant reduction of the live cell  
304 population (Figure 2E). Additionally, HDL treatment increased early apoptosis rates compared  
305 to control irrespective of the particle composition (Figure 2F). In agreement with the data from  
306 viability assays (Figure 2B and C), rHDL1 was able to significantly expand the late apoptotic

307 cell pool, indicating substantial cancer cell killing activity of this small, lipid-poor HDL particle  
308 (Figure 2G).

309 The depletion of cellular cholesterol pools activates endogenous cholesterol synthesis  
310 pathways as well as LDLR expression for the exogenous uptake of cholesterol (34,35).  
311 Therefore, we hypothesized that rHDL treatment might increase transcription of key enzymes  
312 of the cholesterol synthesis / uptake machinery. Indeed, and in contrast to control-, nHDL- and  
313 rHDL2-treated cells, rHDL1 particles significantly induced the expression of 3-hydroxy-  
314 3methyl-glutaryl-coenzyme A reductase (*Hmgcr*) at 50 and 75 µg/ml (Figure 2H). While rHDL1  
315 and nHDL dose-dependently increased mRNA levels of the hydroxymethylglutaryl-CoA  
316 synthase (*Hmgcs*), rHDL2 failed to do so (Figure 2I). Furthermore, the lipid-poor rHDL1  
317 particles increased LDLR gene expression at 50 and 75 µg/ml. Together, these data indicate  
318 that rHDL1 particles reduce viability and induce apoptosis of pancreatic cancer cells, paralleled  
319 by an induction of the cellular cholesterol synthesis- and import machinery.

320

321 **The HDL particle composition determines its net cholesterol efflux capacity from PDAC**  
322 **cells.** These observed effects suggested efficient cholesterol depletion of cancer cells when  
323 treated with rHDL1 particles, likely facilitated via cholesterol efflux from cellular cholesterol  
324 pools to extracellular HDL. To measure the cholesterol efflux capacity of different HDL species,  
325 we labeled Panc02 and 6066 cells with <sup>3</sup>H cholesterol and analyzed the transfer of the  
326 radiotracer onto HDL. As anticipated from previous results, rHDL1 was able to remove  
327 significantly more cholesterol from cancer cells compared to nHDL. However, the cholesterol  
328 efflux capacity of lipid-rich rHDL2 particles even exceeded the one of rHDL1 (Figure 3A).  
329 Cholesterol efflux is primarily regulated by cell surface receptors such as SR-B1 and family  
330 members of the ABC-transporters such as ABCA1 and ABCG1. While expression levels of  
331 SR-B1 are high in Panc02 cells, ABCA1 expression is rather low and ABCG1 mRNA levels  
332 are hardly detectable (Supplementary Figure 1). Therefore, and to get a more detailed view of  
333 the cholesterol transport properties of the different HDL particles, we first analyzed cholesterol  
334 efflux in the presence or absence of the SR-B1-blocking small molecule inhibitor BLT1 (36).  
335 Pretreatment of Panc02 cells with BLT1 significantly reduced cholesterol efflux to nHDL and  
336 rHDL1 particles. In contrast, efflux of <sup>3</sup>H cholesterol towards rHDL2 particles was only  
337 moderately affected (Figure 3B). As SR-B1 mediates bi-directional lipid transfer (9), we  
338 synthesized rHDL particles containing both <sup>3</sup>H cholesteryl-ester and <sup>14</sup>C cholesterol (Figure  
339 3C) and used those particles to analyze lipid influx by measuring the accumulation of  
340 intracellular radiotracer molecules. Although containing the same amount of radiotracer  
341 compared to rHDL1, the influx of free cholesterol was significantly increased when Panc02  
342 cells were incubated with the lipid-laden rHDL2 particles. BLT1-mediated SR-B1 inhibition  
343 blunted the influx of free cholesterol to a similar extent (Figure 3D). Interestingly, lipid-laden

344 rHDL2 particles substantially exceeded rHDL1 particles in their ability to transfer cholesteryl-  
345 oleate onto pancreatic cancer cells. Similar to the data observed for cholesterol efflux, BLT1  
346 blocked this effect only to a small extent (Figure 3E). These data identify rHDL2 particles to be  
347 more efficient in mediating lipid exchange with pancreatic cancer cells compared to lipid-poor  
348 rHDL1 particles and an overall reduced efficacy of BLT1 to block rHDL2-mediated lipid flux. Of  
349 note, while rHDL1 particles again showed the highest apoptosis-inducing capacity, BLT1  
350 treatment of Panc02 cells even further induced early and late apoptotic cells in the presence  
351 of rHDL1, but not of rHDL2 particles (Figure 3F and G). One explanation could be that  
352 compared to nHDL and rHDL1, the affinity of rHDL2 might be higher towards SR-B1, thereby  
353 reducing the ability of BLT1 to block lipid transport. This phenomenon of high affinity of lipid-  
354 rich HDLs towards SR-B1 has been previously described (reviewed in (9)), which might further  
355 be exacerbated by the high expression levels of SR-B1 in Panc02 cells.

356

### 357 **The LXR agonist TO901317 increases rHDL1-specific cholesterol efflux and apoptosis.**

358 The rHDL1-specific increase in apoptosis upon inhibition of SR-B1 points towards the  
359 involvement of SR-B1-independent mechanisms that mediate the anti-neoplastic effect of  
360 rHDL1. As small and lipid-poor HDL particles are highly efficient substrates for ABCA1-  
361 mediated cholesterol efflux, we analyzed the potential role of ABCA1 in the cholesterol efflux-  
362 driven anti-proliferative effects of rHDL1 particles. To manipulate ABCA1 protein levels in  
363 Panc02 cells, we used the LXR-agonist TO901317 (TO, Figure 4A). As expected, TO  
364 treatment led to an increase of cholesterol efflux to rHDL1 particles of 35%. Although  
365 cholesterol efflux to rHDL2 particles was also increased in the presence of TO, this effect was  
366 significantly weaker compared to rHDL1-mediated efflux (Figure 4B). Importantly, only rHDL1  
367 particles reduced the amount of intracellular <sup>3</sup>H cholesterol in the presence of TO, pointing  
368 towards an ABCA1-centered rHDL1-specific depletion of cholesterol pools in Panc02 cells  
369 (Figure 4C). Finally, SR-B1 inhibition of TO-treated, ABCA1-expressing cells showed a  
370 profound pro-apoptotic effect on Panc02 cells in the presence of rHDL1 particles, which was  
371 blunted when rHDL2 particles were used (Figure 4D).

372 Together, lipid poor, discoidal-like rHDL1 particles induced a significant pro-apoptotic effect in  
373 Panc02 cells by unidirectional cellular cholesterol removal via ABCA1. In contrast, the pro-  
374 apoptotic effect was diminished when lipid-rich rHDL2 particles or native HDL isolated from  
375 human plasma were used. The previously reported high affinity of those particles to SR-B1 as  
376 well as their increased efficacy in mediating bidirectional lipid flux reduces the net cholesterol-  
377 removing capacity of those particles, thereby making them less effective in killing pancreatic  
378 cancer cells.

379 **Liver-specific AAV-mediated APOA1 expression and rHDL injections reduce tumor**  
380 **burden in Panc02-bearing ApoA1 KO mice.** To demonstrate this anti-tumor effect of HDL

381 particles *in vivo*, we first compared tumor growth kinetics of WT and APOA1 deficient mice  
382 (*Apoa1* KO), which exhibit dramatically reduced plasma HDL levels (37). Of note, we were  
383 unable to detect significant differences in tumor growth and tumor weight in the Panc02 tumor  
384 model as well as in the B16F10, LLC and E0771 tumor models, which demonstrates an  
385 insignificant anti-tumor effect of mature, endogenous HDL particles at least in the murine  
386 system (Supplementary Figure 2A-D). Next, and as a consequence of the data obtained from  
387 *in vitro* experiments, we decided to artificially introduce APOA1 / rHDL particles into tumor-  
388 bearing *Apoa1* KO mice. Therefore, we expressed murine APOA1 in the liver of Panc02 tumor-  
389 bearing mice using adeno-associated viral particles (AAV-APOA1). Robust expression levels  
390 of the APOA1 mRNA were detected in in the liver of end stage Panc02 tumor-bearing WT and  
391 *Apoa1* KO AAV-APOA1 mice, whereas APOA1 mRNA levels were absent from livers of *Apoa1*  
392 KO mice (Figure 5A). Western blot analysis revealed the absence of APOA1 from plasma  
393 samples of *Apoa1* KO mice, whereas APOA1 protein was readily detectable in the plasma 5  
394 days post AAV injection and further increased after 14 and 21 days (Figure 5B). AAV-mediated  
395 APOA1 expression significantly increased HDL-C levels compared to APOA1 deficient mice,  
396 although HDL-associated cholesterol levels clearly remained below those in WT mice (Figure  
397 5C). Importantly, AAV-APOA1 expression in *Apoa1* KO mice significantly reduced Panc02  
398 tumor growth kinetics as well as tumor weight at experimental end stage (Figure 5E). Finally,  
399 and to examine a therapeutic potential of rHDL particles *in vivo*, we compared Panc02 tumor  
400 growth in WT mice, *Apoa1* KO mice receiving PBS and *Apoa1* KO mice receiving intravenous  
401 injections of rHDL (0.2 mg per injection every other day). Thereby, rHDL reduced Panc02  
402 tumor weight significantly compared with *Apoa1* KO mice, pointing towards a moderate anti-  
403 tumor effect of rHDL particles also *in vivo* (Figure 5F).

404 As APOA1 (mimetic peptides) / HDL has been previously demonstrated to affect tumor  
405 angiogenesis as well as tumor associated immune cell populations (3), we measured  
406 intratumoral hypoxia and immune cell infiltration. Thereby, we found that AAV-mediated  
407 APOA1 expression did not affect tumor associated hypoxia, a surrogate marker for tumor  
408 angiogenesis (Supplementary figure 3A and B). Flow cytometric analysis of tumor associated  
409 immune cell populations showed an increase in MRC1<sup>+</sup> M2-polarized Macrophages in the  
410 *Apoa1* KO background, which was not substantially reverted by reintroduction of APOA1  
411 (Supplementary Figure 3C). Other tumor-associated immune cell populations such as myeloid-  
412 derived suppressor cells (MDSC), CD8<sup>+</sup> cytotoxic T cells and CD4<sup>+</sup> T-helper cells remained  
413 unchanged among all three groups of mice (Supplementary Figure 3D, E, F). Together, we  
414 conclude that in the here applied model of PDAC, HDL neither rendered tumor-associated  
415 hypoxia / angiogenesis nor did it change infiltration of immune cell populations. Therefore, we  
416 speculate that in parallel to the data from *in vitro* experiments, the increased cholesterol efflux  
417 capacity of artificially introduced HDL particles mediates the observed anti-tumor effect.

418  
419  
420  
421  
422  
423  
424  
425  
426  
427  
428  
429  
430  
431  
432  
433  
434  
435  
436  
437  
438  
439  
440  
441  
442  
443

**Decreased HDL-C and decreased efflux capacity of plasma samples from PDAC patients.** To test our hypothesis in a clinical relevant setting, we collected plasma samples from pancreatic cancer patients and analyzed lipid parameters and cholesterol efflux capacities. Although pancreatic cancer plasma samples showed no difference in triglyceride and total cholesterol levels (Figure 6A and B), HDL-C levels were significantly decreased when compared to plasma samples of a cohort of healthy volunteers (Figure 6C). Of note, this drop in HDL-associated cholesterol also translated into decreased cholesterol efflux capacity of the patient plasma samples from Panc02 cells (Figure 6D). Accumulation of intracellular cholesterol can either be regulated by uptake of extracellular cholesterol via the LDLR or endogenous synthesis of cholesterol from acetyl-CoA precursor molecules. *In silico* Kaplan Meier analyses with the UCSC Xena database (38) further revealed a potential dysregulation of cholesterol homeostasis in PDAC, showing an inverse association of LDLR and HMGCS expression levels with overall survival in a cohort of pancreatic cancer patients (Figure 6E and F). This inverse correlation of the LDLR and HMGCS with overall survival persisted with high significance when analyzing the TCGA Pan-cancer database (Supplementary Figure 4A and B). In contrast, expression of HMGCR showed no association with survival data (Supplementary Figure 4C and D). Interestingly, expression levels of *MYLIP*, the gene encoding the LDLR-degrading ubiquitin E3 ligase IDOL, showed a significant, positive association with overall survival parameters in the TCGA Pan-cancer database and inversely correlated with LDLR expression levels in the analyzed primary tumor samples (Supplementary Figure 4E and F). These data further underline the importance of cholesterol availability for pancreatic tumor growth and indicate that the depletion of intracellular cholesterol pools might hold potential as a therapeutic strategy to improve the prognosis of pancreatic cancer patients.

444 **Discussion**

445 Together, the presented data provide evidence that efficient cellular cholesterol removal  
446 mediated by small, lipid-poor reconstituted HDL particles reduce pancreatic cancer cell  
447 proliferation and growth and might hold the potential to attenuate the development and spread  
448 of the disease.

449 Although SR-B1 is highly expressed in the applied pancreatic cancer cell lines and significantly  
450 contributes to HDL-mediated cholesterol flux, forced efflux via ABCA1 increases the anti-tumor  
451 activity of those particles (Figure 7). In contrast, lipid-laden spherical HDL particles, which  
452 exhibit a higher affinity for SR-B1-directed lipid exchange at the plasma membrane, show  
453 reduced or insignificant ability to counteract cancer cell proliferation and tumor growth (Figure  
454 7). Unidirectional, ABCA1-driven cholesterol efflux via small rHDL particles might thereby  
455 cause depletion of cellular cholesterol pools, eventually leading to decreased proliferation and  
456 viability of cancer cells. These results indicate that the HDL particle composition and thereby  
457 HDL functional metrics might determine its anti-tumor capacity.

458 In the field of cardiovascular research, HDL functionality is currently under intense  
459 investigation, as the gold-standard plasma parameter, level of HDL-C, has been shown not to  
460 correlate with cardiovascular risk in interventional trials aiming to increase circulating HDL-C  
461 (39). One potential explanation for this discrepancy is the vast heterogeneity of the HDL  
462 particle pool. HDLs appear in the plasma as small, lipid-poor pre- $\beta$  HDL and lipid-enriched  $\alpha$ -  
463 HDL particles. Thereby, the pre- $\beta$  fraction (mimicked by HDL1 particles used in this study),  
464 which only comprises about 5% of totals HDLs in the circulation, performs net cholesterol efflux  
465 from peripheral cells, predominantly macrophage foam cells, to eventually become  $\alpha$ -HDLs  
466 (9). This  $\alpha$ -HDL fraction is enriched in phospholipids, CE, and triglycerides, and acts as high  
467 affinity ligand for SR-B1, which, under physiological conditions, serves as receptor on  
468 hepatocytes that binds and sequesters HDL-associated cholesterol for excretion (31). SR-B1  
469 in turn was previously shown to be overexpressed in many cancer entities including pancreatic  
470 cancer (40,41). Therefore, and as the results from this study indicate,  $\alpha$ -HDL particles might  
471 serve as cholesterol and CE source for cancer cells, eventually utilized as cellular fuel to drive  
472 cancer cell proliferation.

473 Efforts to artificially increase the cholesterol removing pre- $\beta$  HDL fraction to drive ABCA1-  
474 mediated net cholesterol depletion from cancer cells might therefore provide a molecular axis  
475 that offers therapeutic potential for the treatment of PDAC. In support of this hypothesis, LXR  
476 agonists, which are potent activators of ABCA1 expression and thereby cholesterol efflux,  
477 reduced proliferation, cell cycle progression and colony formation of human PDAC cell lines  
478 (42). Moreover, LXR agonists have also been demonstrated to increase the expression of  
479 ABCA1 and the induction of the LDLR-degrading ubiquitin E3 Ligase IDOL, which leads to  
480 tumor cell apoptosis and a reduction in tumor growth in glioblastoma xenograft models (43).

481 Of note, high levels of LDLR and low levels of IDOL (*Myliip*) expression correlate with a worse  
482 prognosis in patients suffering from pancreatic cancer and other tumor entities (Figure 6 and  
483 Supplementary Figure 4). Cholesterol depletion by the use of statins was also shown to inhibit  
484 gallbladder cancer cell proliferation and sensitized those cells to cisplatin treatment, possibly  
485 by the inhibition of the DNA repair machinery (44). In view of those data, experiments which  
486 combine the administration of LXR agonists and efficient cholesterol acceptors such as pre- $\beta$ -  
487 like rHDL particles with standard of care chemotherapy will provide valuable insights  
488 concerning the therapeutic applicability of the here presented preclinical findings.

489 As mentioned in the introduction, clinical studies indicate an inverse association of HDL-C with  
490 cancer incidence of multiple entities. Interestingly, data presented here point towards a  
491 concomitant decrease in the cholesterol efflux capacity of plasma samples from cancer  
492 patients (Figure 6). In addition to a reduction in HDL quantity, tumors might also be capable of  
493 influencing HDL functionality. HDL associated proteins such paraoxonase 1 (PON1) and  
494 serum amyloid A (SAA) as well as biochemical modifications of HDL structural components  
495 such as myeloperoxidase (MPO)-mediated nitration or chlorination of APOA1 are currently  
496 known to influence HDL's reverse cholesterol transport capacity. The overexpression of PON1,  
497 an HDL-associated enzyme with potent anti-oxidative activity, has been shown to increase  
498 HDL-C efflux *in vitro* and reverse cholesterol transport *in vivo* (45). Of note, PON1 serum  
499 activity is reduced in cancer patients of various entities (40). SAA1 is an acute phase protein  
500 and transported predominantly on HDL in the bloodstream. Upon infection, SAA1 levels  
501 increase dramatically and its association with HDL has been demonstrated to reduce the  
502 lipoproteins' anti-inflammatory properties and its cholesterol efflux capacity (40,46).

503 Interestingly, certain cancer cell lines, tumor associated macrophages and pancreatic cancer-  
504 associated adipocytes produce large amounts of SAA (40,47). SAA levels were furthermore  
505 shown to directly correlate with disease progression, reduced survival rate and poor overall  
506 prognosis (40). In addition, macrophages and myeloid-derived suppressor cells accumulating  
507 in cancer patients express high levels of the enzyme MPO, a candidate enzyme that oxidatively  
508 modifies HDL, thereby reducing its cholesterol efflux capacity (39,48). Interestingly, MPO-  
509 mediated HDL modifications enhanced association of HDL with macrophages in cell culture  
510 and increased cholesteryl-ether transfer into target cells in an SR-B1-dependent manner (48).

511 If this scenario is likely to happen in the tumor microenvironment, oxidatively modified HDL  
512 particles, while losing their cholesterol removal capacity, might serve as efficient cholesterol  
513 donors in SR-B1-expressing cancer entities such as pancreatic cancer.

514 In summary, the presented data demonstrate a potentially important role of HDL-mediated  
515 cholesterol efflux in reducing the proliferative as well as tumor initiating capacity of PDAC cells.  
516 Thereby, the HDL particle composition dictates its anti-tumor activity by regulating directionality  
517 of net cholesterol flow between cancer cells and the lipoprotein particle. Future studies,

518 integrating the manipulation of cancer cell-specific HDL receptor expression as well as the  
519 detailed analysis of HDL particle functionality should be addressed to eventually implement  
520 cholesterol depletion as a combinatorial and supportive treatment modality in pancreatic  
521 cancer.

522

523

#### 524 **Acknowledgements**

525 The authors would like to thank Agnes Hunger, Franziska Pupp, Victoria Guggenberger and  
526 Anna-Lena Höbler for excellent technical assistance and Ernst Steyrer and Wolfgang Sattler  
527 (both Meduni Graz) for support and fruitful discussions in the process of conceptualizing and  
528 preparing this manuscript. RB was supported by an Erwin-Schrödinger fellowship of the  
529 Austrian Science Fund (FWF, J3664-B19). FU received a Werner Otto fellowship from the  
530 Werner Otto foundation. MW was supported by the Medical Faculty of the University of  
531 Hamburg (FFM program). SL is supported by the by the European Research Council (ERC)  
532 under the European Union's Horizon 2020 research and innovation programme (Grant  
533 Agreement No. 758713) and by the Hector Foundation II.

534

535

536

537

538



539

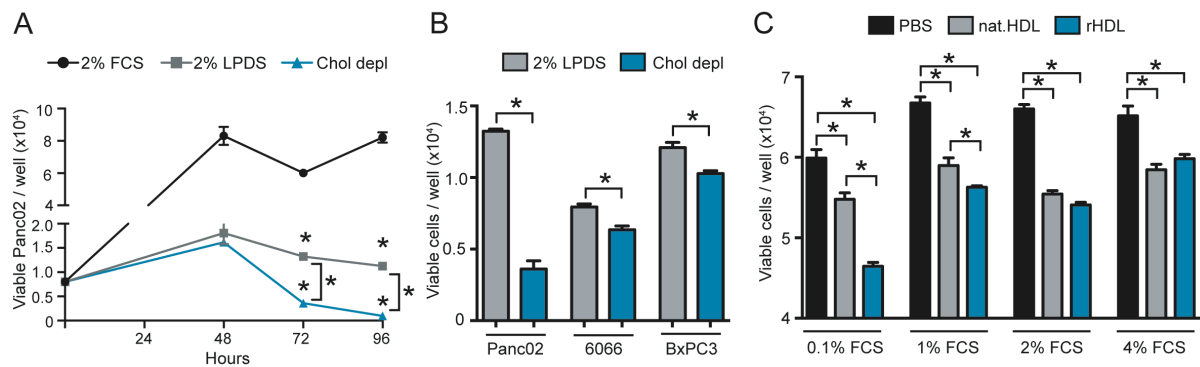

540

541

542

543

544

545

546

547

548

549

550

551

552

**Figure 1. Pancreatic cancer cells are sensitive towards cholesterol depletion and rHDL particles.** **A**, Panc02 cells were grown in RPMI medium containing either 2% FCS, 2% LPDS or 2% LPDS with the addition of 5 $\mu$ M lovastatin and 100 $\mu$ M mevalonate. Viability of cells was determined every 24 h using a WST1 viability assay (n=4/4/4; \*p<0.05; one-way ANOVA). **B**, Viability was determined of Panc02, 6066 and BxPC3 pancreatic cancer cells after culture of cells for 72 hours in either RPMI medium with 2% LPDS or cholesterol depleted medium (n=4/4; \*p<0.05; unpaired t-test). **C**, Panc02 cells cultured in RPMI medium with increasing concentrations of FCS were treated for 48 h with PBS, HDL isolated from human plasma of a healthy donor (75 $\mu$ g/ml) or reconstituted HDL (75 $\mu$ g/ml, molar ratio of PC:C:CE:APOA1 of 100:12.5:0:1, ZLB Behring) and viability was determined using a WST1 assay (n=4/4/4; \*p<0.05; one-way ANOVA).

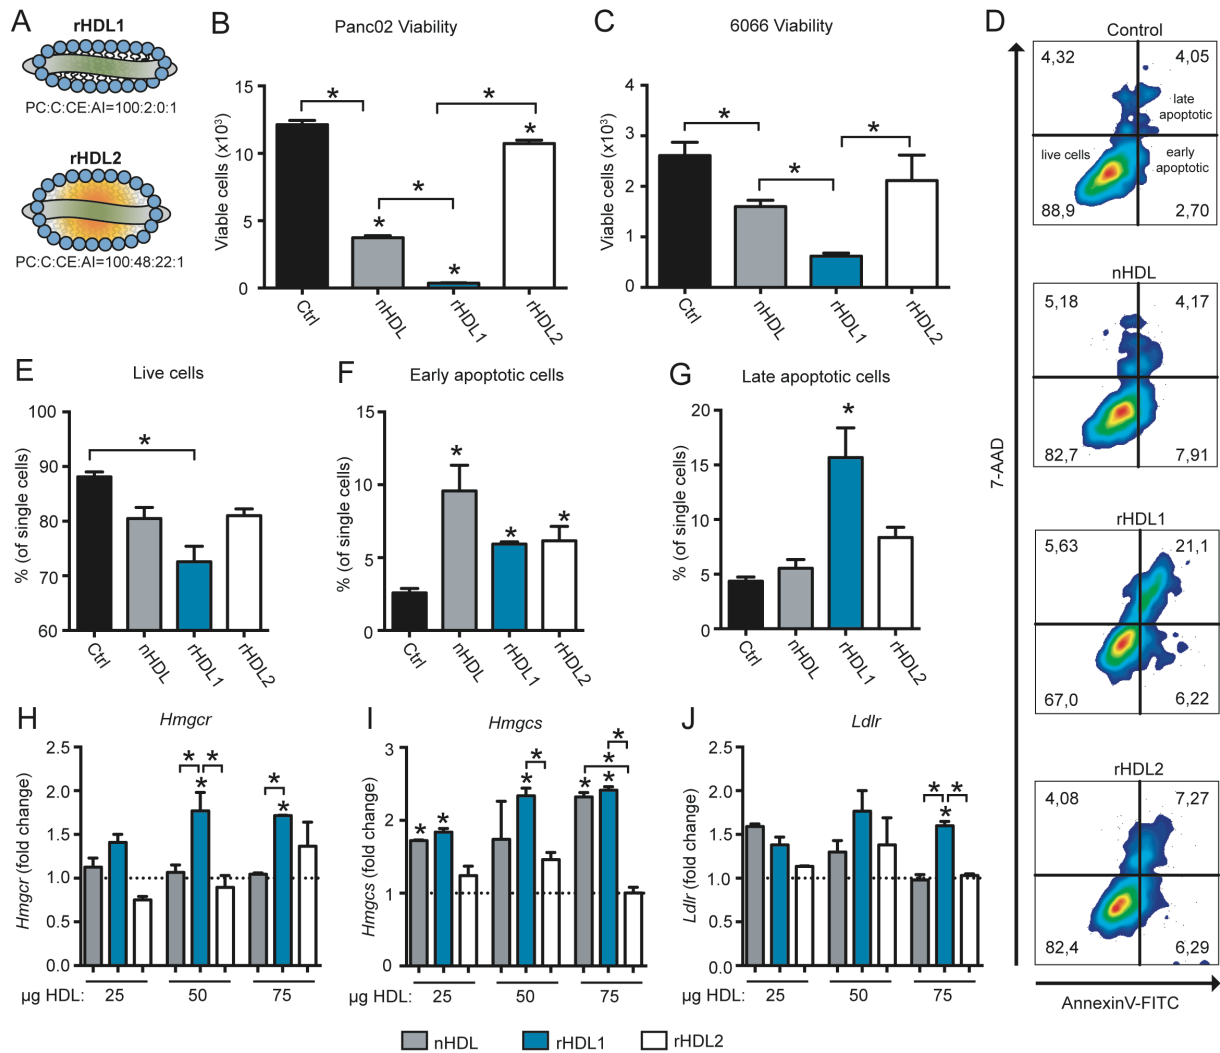

553

554

555

556

557

558

559

560

561

562

563

564

565

566

567

568

**Figure 2. The HDL particle composition differentially affects pancreatic cancer cell growth characteristics.** **A**, HDL particles were reconstituted using the indicated molar ratios of phosphatidylcholine (PC), cholesterol (C), cholesterol ester (CE) and apolipoprotein A-I (APOA1). **B**, **C**, Following a 24 h starvation period, Panc02 and 6066 cells were cultured in RPMI medium with 2% FCS in the presence of either PBS, native human HDL (nHDL), or the indicated rHDL particles (75 $\mu$ g/ml) for 48 h. Afterwards, viability was determined using a WST1 assay (n=4 replicates per group; \*p<0.05; unpaired t-test). **D**, Representative flow cytometry blots of Panc02 cells treated with different HDL particles (75 $\mu$ g/ml) stained for the detection of apoptosis using 7-AAD and Annexin-V. **E-G**, quantification of live-, early apoptotic-, and late apoptotic cells from flow cytometry experiments shown in **D** (n=3 replicates per group, \*p<0.05; one-way ANOVA). **H - J**, Panc02 cells were starved for 8 h and afterwards treated with indicated concentrations of different HDL particles for 16 h. qPCR experiments show relative mRNA levels of *Hmgcr*, *Hmgcs* and the *Ldlr* (n=3 replicates per group; \*p<0.05; one-way ANOVA).

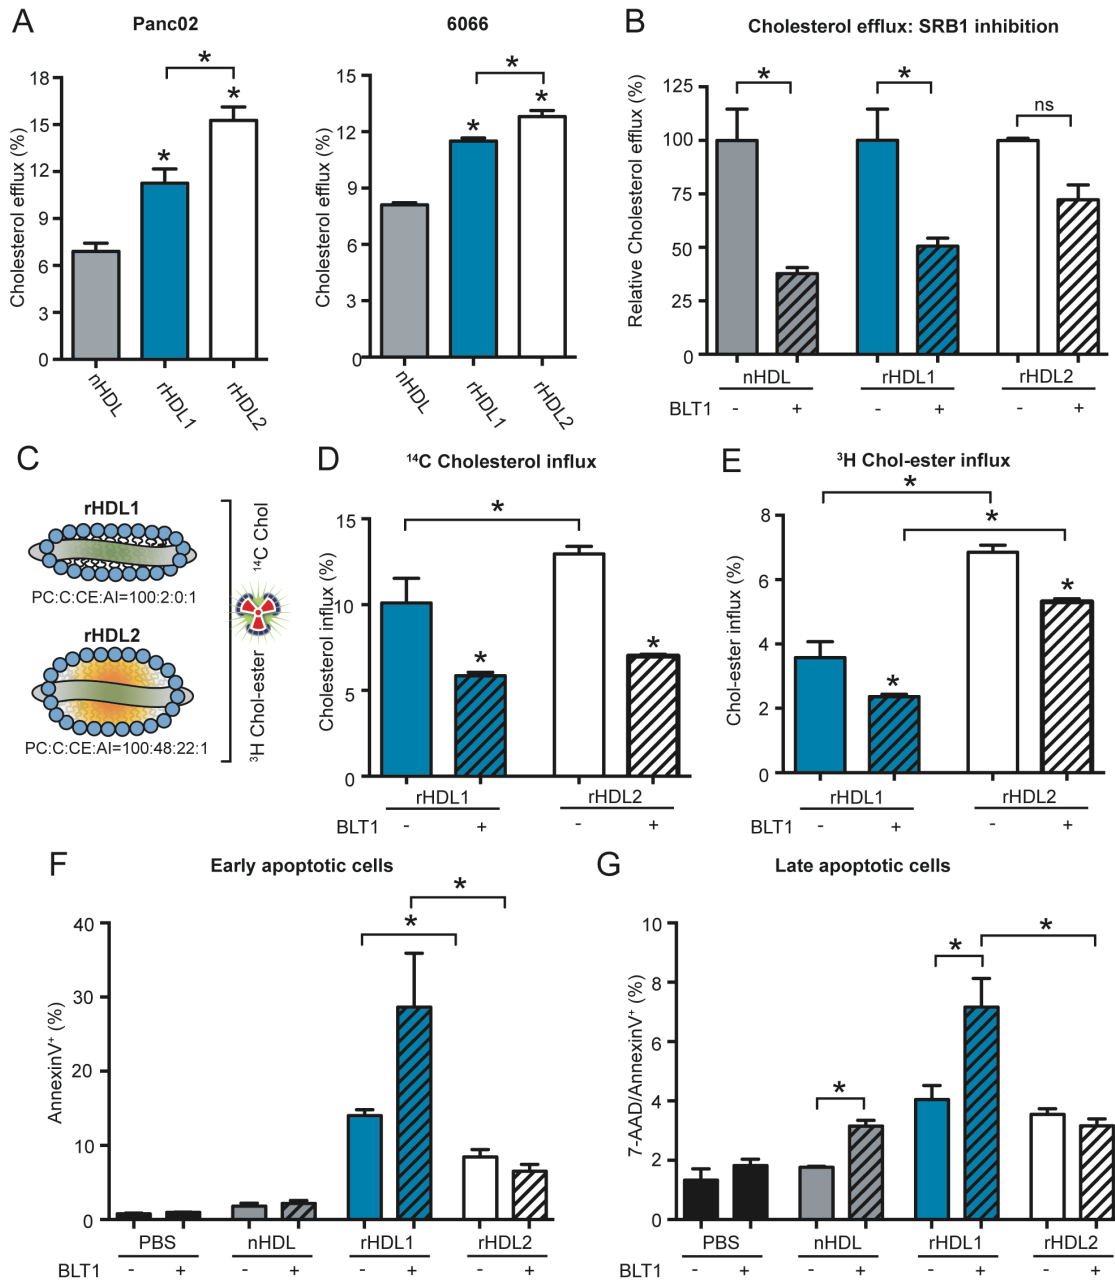

569

570

571

572

573

574

575

576

577

578

579

580

**Figure 3. SR-B1 influences cholesterol efflux and anti-tumor properties of rHDL particles.** **A**, <sup>3</sup>H cholesterol-loaded Panc02 and 6066 cells were subjected to cholesterol efflux assays with indicated HDL particles (10µg/ml) for 8 h. Cholesterol efflux is shown as % of transferred tracer from cells to HDL particles compared to control conditions (n=4; \*p<0.05; one-way ANOVA). **B**, relative, particle specific cholesterol efflux capacity was analyzed in the absence or the presence of BLT1 (n=4; \*p<0.05; one-way ANOVA). **C**, schematic representation of tracer-labeled rHDL particles. **D**, **E**, <sup>14</sup>C cholesterol and <sup>3</sup>H cholesteryl ester influx, respectively, from rHDL to Panc02 cells in the absence or presence of BLT1(n=4; \*p<0.05; one-way ANOVA). **F**, quantification of early and **G**, late apoptotic cells upon treatment of Panc02 cells with indicated HDL particles in the absence or presence of BLT1 (n=3; \*p<0.05; unpaired t-test).

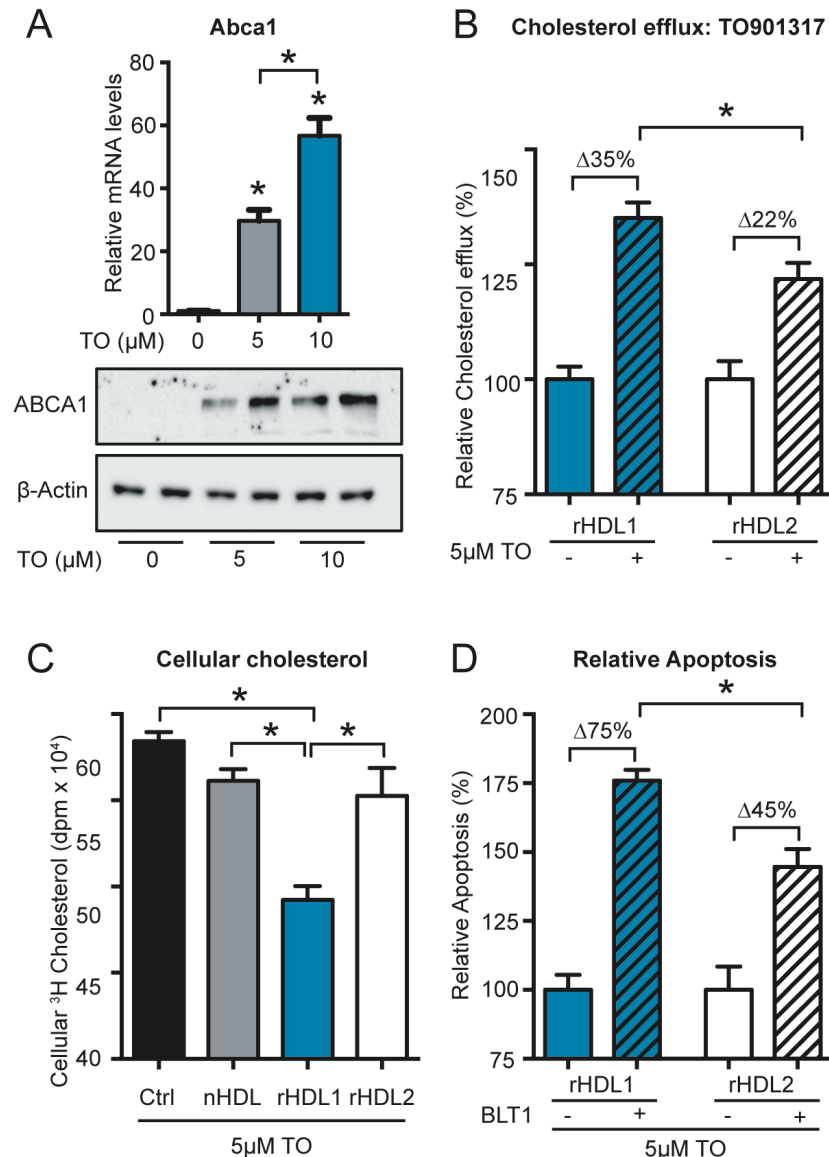

581

582 **Figure 4. The LXR agonist TO901317 increases cholesterol efflux and apoptosis-**

583 **inducing properties of small, lipid poor rHDL. A,** TO901317 induces ABCA1 mRNA and

584 protein levels in Panc02 cells (n=3; \*p<0.05; one-way ANOVA). **B,** relative, particle specific

585 cholesterol efflux from Panc02 cells in the absence or presence of TO901317 (n=4; \*p<0.05;

586 unpaired t-test). **C,**  $^3\text{H}$  cholesterol accumulation in Panc02 cells in the presence of TO901317

587 following efflux to indicated HDL particles (n=4; \*p<0.05; one-way ANOVA). **D,** relative,

588 particle-specific apoptosis rates of TO901317-treated Panc02 cells induced by either rHDL1

589 or rHDL2 in the absence or presence of BLT1 (n=3; p<0.05; unpaired t-test).

590

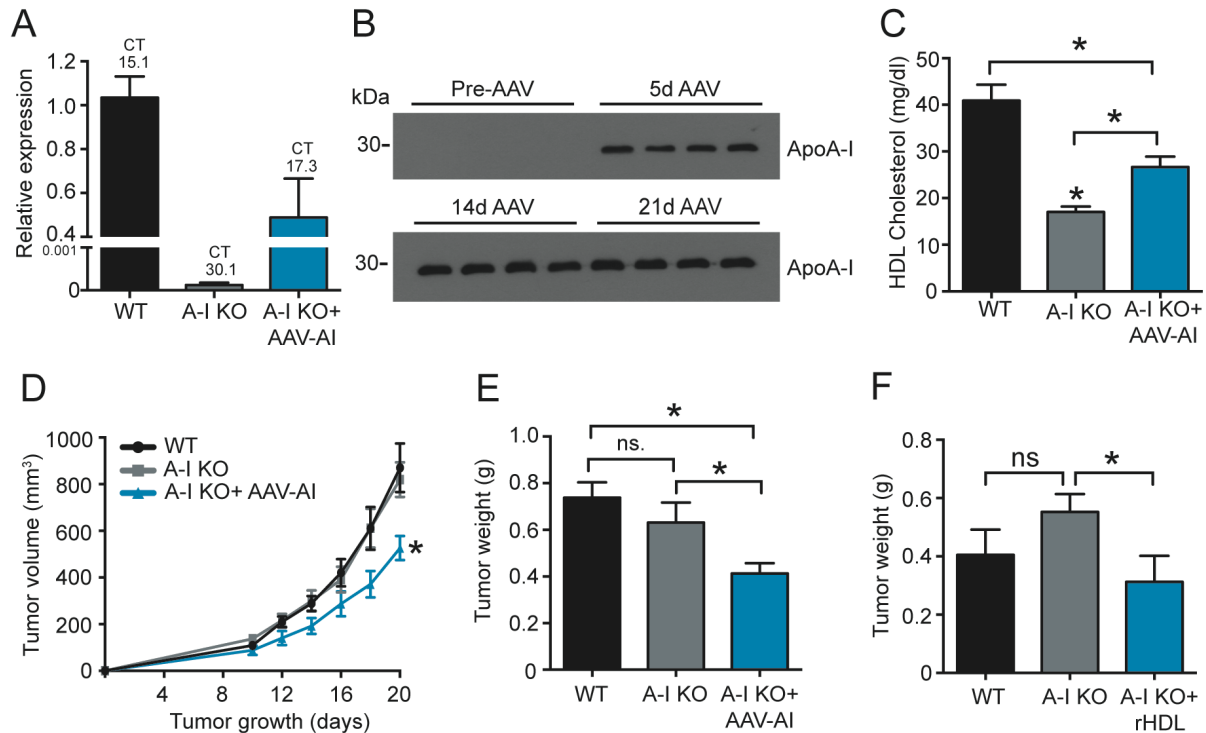

591

592 **Figure 5. AAV-mediated APOA1 reconstitution / rHDL injection reduces Panc02 tumor**

593 **growth in *Apoa1* KO mice. A**, mRNA expression levels of APOA1 in liver tissue of Panc02

594 bearing WT, *Apoa1* KO and AAV-APOA1 reconstituted *Apoa1* KO mice at experimental end

595 stage (n=8/6/7). **B**, Western blot analysis of APOA1 protein levels in plasma of *Apoa1* KO mice

596 prior and post AAV-APOA1 injection. **C**, HDL-C levels in Panc02 tumor bearing mice at

597 experimental end stage (n=8/5/7; \*p<0.05; one-way ANOVA). **D**, Panc02 tumor growth kinetics

598 and **E**, tumor weight at experimental end stage (n=8/5/7; \*p<0.05; unpaired t-test). **F**, Panc02

599 tumor weight of WT, *Apoa1* KO and rHDL (0.2mg per injection; PC:C:CE:APOA1 =

600 100:12.5:0:1, ZLB Behring) - injected *Apoa1* KO mice at experimental end stage (n=7/7/7;

601 \*p<0.05; unpaired t-test).

602

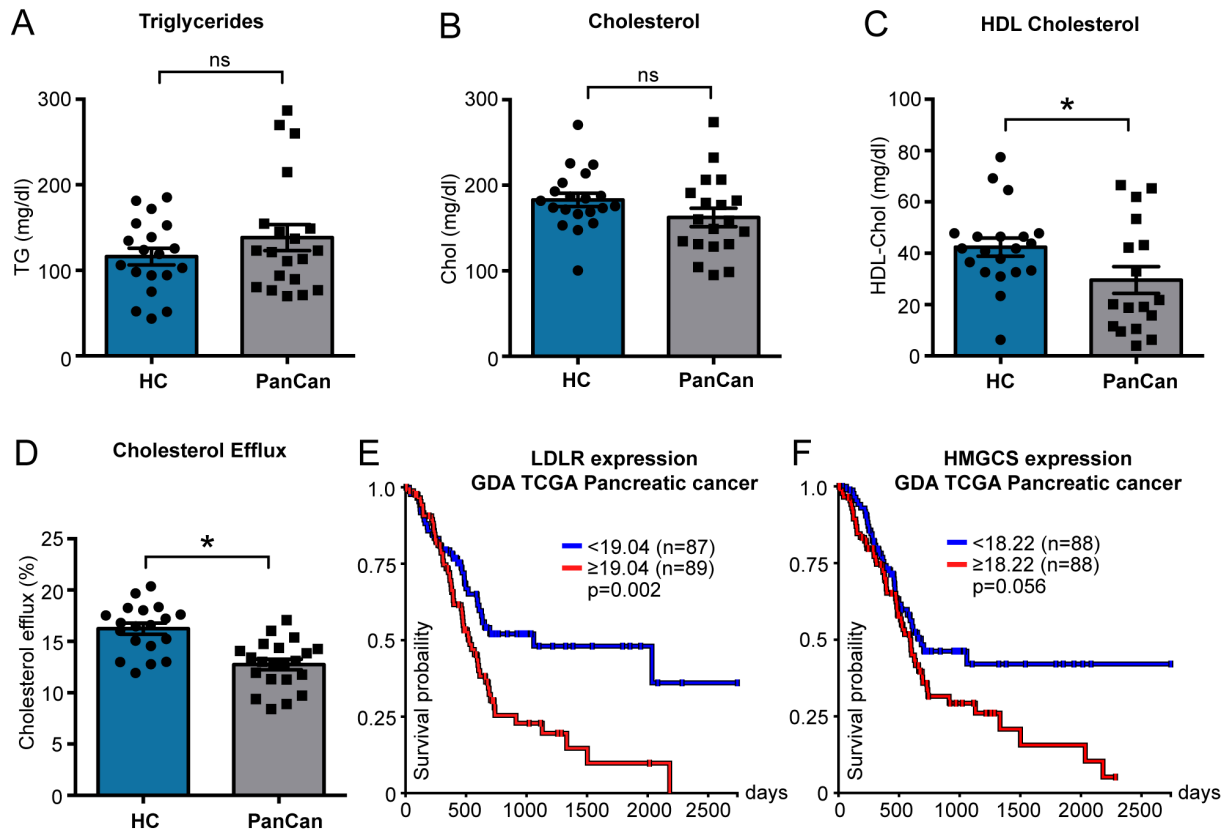

603

604

605

606

607

608

609

610

611

612

**Figure 6. Pancreatic cancer patients show decreased plasma HDL-C and cholesterol efflux capacities compared to healthy donors as well as increased survival probability with lower tumor-associated LDLR and HMGCS expression levels.** **A**, plasma total triglyceride levels, **B**, total cholesterol levels, **C**, HDL-C and **D**, plasma efflux capacity were determined in plasma samples from a cohort of healthy volunteers and pancreatic cancer patients in late stages of their disease (n=19/19; \*p<0.05; unpaired t-test). **E**, **F**, Kaplan Meier overall survival plots for LDLR and HMGCS expression, respectively, in the GDA TCGA Pancreatic cancer cohort (n=176, log-rank test, \*p<0.05, UCSC Xena).

613

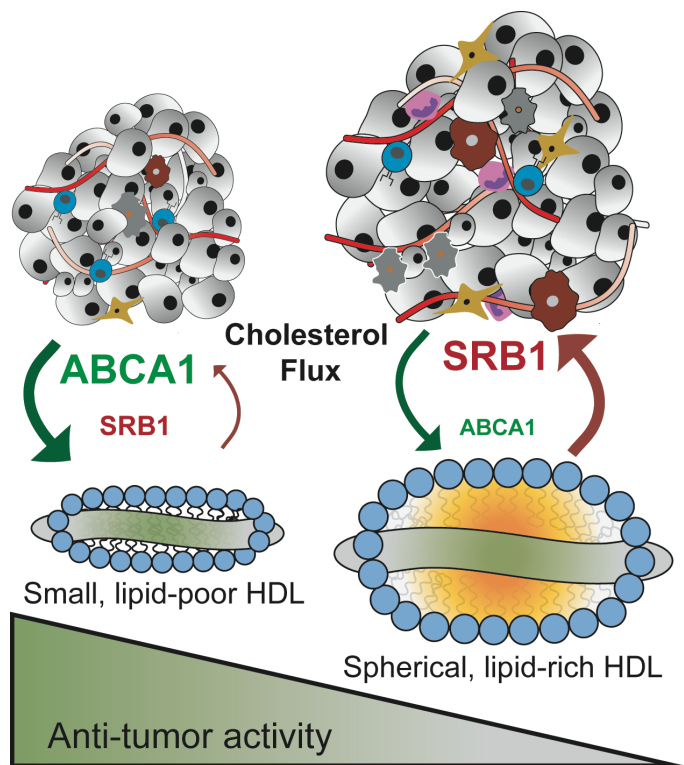

614

615 **Figure 7. Small, lipid-poor HDL particles exert profound anti-tumor properties in PDAC**

616 **models.** Discoidal, lipid-poor reconstituted HDL, by engaging ABCA1-mediated net  
617 net cholesterol efflux, reduce the viability and induce apoptosis of pancreatic cancer cells. In  
618 contrast, lipid-rich spherical HDL particles exhibit a higher affinity towards SR-B1, paralleled  
619 by a marked decrease in their ability to reduce cancer cell viability and inducing cancer cell  
620 apoptosis. Therefore, the particle-specific anti-tumor activity might be regulated by varying  
621 affinities of HDL subspecies towards SR-B1 and ABCA1, which are the dominant receptors  
622 expressed on PDAC cells that drive cholesterol flux at the plasma membrane. Increasing  
623 ABCA1-centered cholesterol depletion via discoidal, lipid-poor reconstituted HDL particles  
624 might be considered a valuable supplementary strategy to increase prognosis of PDAC  
625 patients in the future.

626

627 **References**

- 628 1. Jafri H, Alsheikh-Ali AA, Karas RH. Baseline and on-treatment high-density lipoprotein  
629 cholesterol and the risk of cancer in randomized controlled trials of lipid-altering  
630 therapy. *J Am Coll Cardiol* **2010**;55:2846-54
- 631 2. van Duijnhoven FJ, Bueno-De-Mesquita HB, Calligaro M, Jenab M, Pischon T, Jansen  
632 EH, *et al.* Blood lipid and lipoprotein concentrations and colorectal cancer risk in the  
633 European Prospective Investigation into Cancer and Nutrition. *Gut* **2011**;60:1094-102
- 634 3. Zamanian-Daryoush M, Lindner D, Tallant TC, Wang Z, Buffa J, Klipfell E, *et al.* The  
635 cardioprotective protein apolipoprotein A1 promotes potent anti-tumorigenic effects.  
636 *J Biol Chem* **2013**;288:21237-52
- 637 4. Su F, Kozak KR, Imaizumi S, Gao F, Amneus MW, Grijalva V, *et al.* Apolipoprotein A-I  
638 (apoA-I) and apoA-I mimetic peptides inhibit tumor development in a mouse model of  
639 ovarian cancer. *Proc Natl Acad Sci U S A* **2010**;107:19997-20002
- 640 5. Cedo L, Garcia-Leon A, Baila-Rueda L, Santos D, Grijalva V, Martinez-Cignoni MR, *et al.*  
641 ApoA-I mimetic administration, but not increased apoA-I-containing HDL, inhibits  
642 tumour growth in a mouse model of inherited breast cancer. *Sci Rep* **2016**;6:36387
- 643 6. Amar MJ, D'Souza W, Turner S, Demosky S, Sviridov D, Stonik J, *et al.* 5A apolipoprotein  
644 mimetic peptide promotes cholesterol efflux and reduces atherosclerosis in mice. *J*  
645 *Pharmacol Exp Ther* **2010**;334:634-41
- 646 7. Navab M, Anantharamaiah GM, Reddy ST, Hama S, Hough G, Grijalva VR, *et al.* Oral D-  
647 4F causes formation of pre-beta high-density lipoprotein and improves high-density  
648 lipoprotein-mediated cholesterol efflux and reverse cholesterol transport from  
649 macrophages in apolipoprotein E-null mice. *Circulation* **2004**;109:3215-20
- 650 8. Navab M, Anantharamaiah GM, Reddy ST, Hama S, Hough G, Grijalva VR, *et al.*  
651 Apolipoprotein A-I mimetic peptides. *Arterioscler Thromb Vasc Biol* **2005**;25:1325-31
- 652 9. Camont L, Chapman MJ, Kontush A. Biological activities of HDL subpopulations and  
653 their relevance to cardiovascular disease. *Trends Mol Med* **2011**;17:594-603
- 654 10. Falasca M, Kim M, Casari I. Pancreatic cancer: Current research and future directions.  
655 *Biochim Biophys Acta* **2016**;1865:123-32
- 656 11. Hosein AN, Brekken RA, Maitra A. Pancreatic cancer stroma: an update on therapeutic  
657 targeting strategies. *Nat Rev Gastroenterol Hepatol* **2020**;17:487-505
- 658 12. Ryan DP, Hong TS, Bardeesy N. Pancreatic adenocarcinoma. *N Engl J Med*  
659 **2014**;371:2140-1
- 660 13. Guillaumond F, Bidaut G, Ouaisi M, Servais S, Gouirand V, Olivares O, *et al.* Cholesterol  
661 uptake disruption, in association with chemotherapy, is a promising combined  
662 metabolic therapy for pancreatic adenocarcinoma. *Proc Natl Acad Sci U S A*  
663 **2015**;112:2473-8
- 664 14. Ehmann M, Felix K, Hartmann D, Schnolzer M, Nees M, Vorderwulbecke S, *et al.*  
665 Identification of potential markers for the detection of pancreatic cancer through  
666 comparative serum protein expression profiling. *Pancreas* **2007**;34:205-14
- 667 15. Krieger M. Isolation of somatic cell mutants with defects in the endocytosis of low-  
668 density lipoprotein. *Methods Enzymol* **1986**;129:227-37
- 669 16. Loregger A, Cook EC, Nelson JK, Moeton M, Sharpe LJ, Engberg S, *et al.* A MARCH6 and  
670 IDOL E3 Ubiquitin Ligase Circuit Uncouples Cholesterol Synthesis from Lipoprotein  
671 Uptake in Hepatocytes. *Mol Cell Biol* **2016**;36:285-94
- 672 17. Axmann M, Karner A, Meier SM, Stangl H, Plochberger B. Enrichment of Native  
673 Lipoprotein Particles with microRNA and Subsequent Determination of Their  
674 Absolute/Relative microRNA Content and Their Cellular Transfer Rate. *J Vis Exp* **2019**



- 675 18. Bauer R, Plieschnig JA, Finkes T, Riegler B, Hermann M, Schneider WJ. The developing  
676 chicken yolk sac acquires nutrient transport competence by an orchestrated  
677 differentiation process of its endodermal epithelial cells. *J Biol Chem* **2013**;288:1088-  
678 98
- 679 19. Jonas A. Reconstitution of high-density lipoproteins. *Methods Enzymol* **1986**;128:553-  
680 82
- 681 20. Matz CE, Jonas A. Micellar complexes of human apolipoprotein A-I with  
682 phosphatidylcholines and cholesterol prepared from cholate-lipid dispersions. *J Biol*  
683 *Chem* **1982**;257:4535-40
- 684 21. Gray SJ, Choi VW, Asokan A, Haberman RA, McCown TJ, Samulski RJ. Production of  
685 recombinant adeno-associated viral vectors and use in in vitro and in vivo  
686 administration. *Curr Protoc Neurosci* **2011**;Chapter 4:Unit 4 17
- 687 22. Xiao X, Li J, Samulski RJ. Production of high-titer recombinant adeno-associated virus  
688 vectors in the absence of helper adenovirus. *J Virol* **1998**;72:2224-32
- 689 23. Korbelin J, Dogbevia G, Michelfelder S, Ridder DA, Hunger A, Wenzel J, *et al.* A brain  
690 microvasculature endothelial cell-specific viral vector with the potential to treat  
691 neurovascular and neurological diseases. *EMBO Mol Med* **2016**;8:609-25
- 692 24. Bauer R, Udonta F, Wroblewski M, Ben-Batalla I, Santos IM, Taverna F, *et al.* Blockade  
693 of myeloid-derived suppressor cell expansion with all-trans retinoic acid increases the  
694 efficacy of anti-angiogenic therapy. *Cancer Res* **2018**
- 695 25. Li YC, Park MJ, Ye SK, Kim CW, Kim YN. Elevated levels of cholesterol-rich lipid rafts in  
696 cancer cells are correlated with apoptosis sensitivity induced by cholesterol-depleting  
697 agents. *Am J Pathol* **2006**;168:1107-18; quiz 404-5
- 698 26. Zhang Y, Liang M, Sun C, Qu G, Shi T, Min M, *et al.* Statin Use and Risk of Pancreatic  
699 Cancer: An Updated Meta-analysis of 26 Studies. *Pancreas* **2019**;48:142-50
- 700 27. Partecke LI, Sendler M, Kaeding A, Weiss FU, Mayerle J, Dummer A, *et al.* A syngeneic  
701 orthotopic murine model of pancreatic adenocarcinoma in the C57/BL6 mouse using  
702 the Panc02 and 6606PDA cell lines. *Eur Surg Res* **2011**;47:98-107
- 703 28. Wroblewski M, Bauer R, Cubas Cordova M, Udonta F, Ben-Batalla I, Legler K, *et al.* Mast  
704 cells decrease efficacy of anti-angiogenic therapy by secreting matrix-degrading  
705 granzyme B. *Nat Commun* **2017**;8:269
- 706 29. Ouimet M, Barrett TJ, Fisher EA. HDL and Reverse Cholesterol Transport. *Circ Res*  
707 **2019**;124:1505-18
- 708 30. Favari E, Calabresi L, Adorni MP, Jessup W, Simonelli S, Franceschini G, *et al.* Small  
709 discoidal pre-beta1 HDL particles are efficient acceptors of cell cholesterol via ABCA1  
710 and ABCG1. *Biochemistry* **2009**;48:11067-74
- 711 31. Rothblat GH, Phillips MC. High-density lipoprotein heterogeneity and function in  
712 reverse cholesterol transport. *Curr Opin Lipidol* **2010**;21:229-38
- 713 32. Fernandez C, Lobo Md Mdel V, Gomez-Coronado D, Lasuncion MA. Cholesterol is  
714 essential for mitosis progression and its deficiency induces polyploid cell formation.  
715 *Exp Cell Res* **2004**;300:109-20
- 716 33. Martinez-Botas J, Suarez Y, Ferruelo AJ, Gomez-Coronado D, Lasuncion MA.  
717 Cholesterol starvation decreases p34(cdc2) kinase activity and arrests the cell cycle at  
718 G2. *FASEB J* **1999**;13:1359-70
- 719 34. Goldstein JL, Brown MS. Regulation of the mevalonate pathway. *Nature* **1990**;343:425-  
720 30
- 721 35. Goldstein JL, Brown MS. The LDL receptor. *Arterioscler Thromb Vasc Biol* **2009**;29:431-  
722 8

- 723 36. Nieland TJ, Penman M, Dori L, Krieger M, Kirchhausen T. Discovery of chemical  
724 inhibitors of the selective transfer of lipids mediated by the HDL receptor SR-BI. Proc  
725 Natl Acad Sci U S A **2002**;99:15422-7
- 726 37. Williamson R, Lee D, Hagaman J, Maeda N. Marked reduction of high density  
727 lipoprotein cholesterol in mice genetically modified to lack apolipoprotein A-I. Proc  
728 Natl Acad Sci U S A **1992**;89:7134-8
- 729 38. Goldman MJ, Craft B, Hastie M, Repecka K, McDade F, Kamath A, *et al.* Visualizing and  
730 interpreting cancer genomics data via the Xena platform. Nat Biotechnol **2020**;38:675-  
731 8
- 732 39. Thakkar H, Vincent V, Sen A, Singh A, Roy A. Changing Perspectives on HDL: From  
733 Simple Quantity Measurements to Functional Quality Assessment. J Lipids  
734 **2021**;2021:5585521
- 735 40. Ganjali S, Ricciuti B, Pirro M, Butler AE, Atkin SL, Banach M, *et al.* High-Density  
736 Lipoprotein Components and Functionality in Cancer: State-of-the-Art. Trends  
737 Endocrinol Metab **2019**;30:12-24
- 738 41. Julovi SM, Xue A, Thanh LT, Gill AJ, Bulanadi JC, Patel M, *et al.* Apolipoprotein A-II Plus  
739 Lipid Emulsion Enhance Cell Growth via SR-B1 and Target Pancreatic Cancer In Vitro  
740 and In Vivo. PLoS One **2016**;11:e0151475
- 741 42. Candelaria NR, Addanki S, Zheng J, Nguyen-Vu T, Karaboga H, Dey P, *et al.*  
742 Antiproliferative effects and mechanisms of liver X receptor ligands in pancreatic  
743 ductal adenocarcinoma cells. PLoS One **2014**;9:e106289
- 744 43. Guo D, Reinitz F, Youssef M, Hong C, Nathanson D, Akhavan D, *et al.* An LXR agonist  
745 promotes glioblastoma cell death through inhibition of an EGFR/AKT/SREBP-1/LDLR-  
746 dependent pathway. Cancer Discov **2011**;1:442-56
- 747 44. Zhang Y, Liu Y, Duan J, Wang H, Zhang Y, Qiao K, *et al.* Cholesterol depletion sensitizes  
748 gallbladder cancer to cisplatin by impairing DNA damage response. Cell Cycle  
749 **2019**;18:3337-50
- 750 45. Rosenblat M, Vaya J, Shih D, Aviram M. Paraoxonase 1 (PON1) enhances HDL-mediated  
751 macrophage cholesterol efflux via the ABCA1 transporter in association with increased  
752 HDL binding to the cells: a possible role for lysophosphatidylcholine. Atherosclerosis  
753 **2005**;179:69-77
- 754 46. Vaisar T, Tang C, Babenko I, Hutchins P, Wimberger J, Suffredini AF, *et al.* Inflammatory  
755 remodeling of the HDL proteome impairs cholesterol efflux capacity. J Lipid Res  
756 **2015**;56:1519-30
- 757 47. Takehara M, Sato Y, Kimura T, Noda K, Miyamoto H, Fujino Y, *et al.* Cancer-associated  
758 adipocytes promote pancreatic cancer progression through SAA1 expression. Cancer  
759 Sci **2020**;111:2883-94
- 760 48. Suc I, Brunet S, Mitchell G, Rivard GE, Levy E. Oxidative tyrosylation of high density  
761 lipoproteins impairs cholesterol efflux from mouse J774 macrophages: role of  
762 scavenger receptors, classes A and B. J Cell Sci **2003**;116:89-99
- 763
